# Supplementary material
Source: Springer Nature journal article supplement (https://www.springermedizin.de/resource/supplementary/12889_2010_3190_MOESM3_ESM.pdf/9488268)

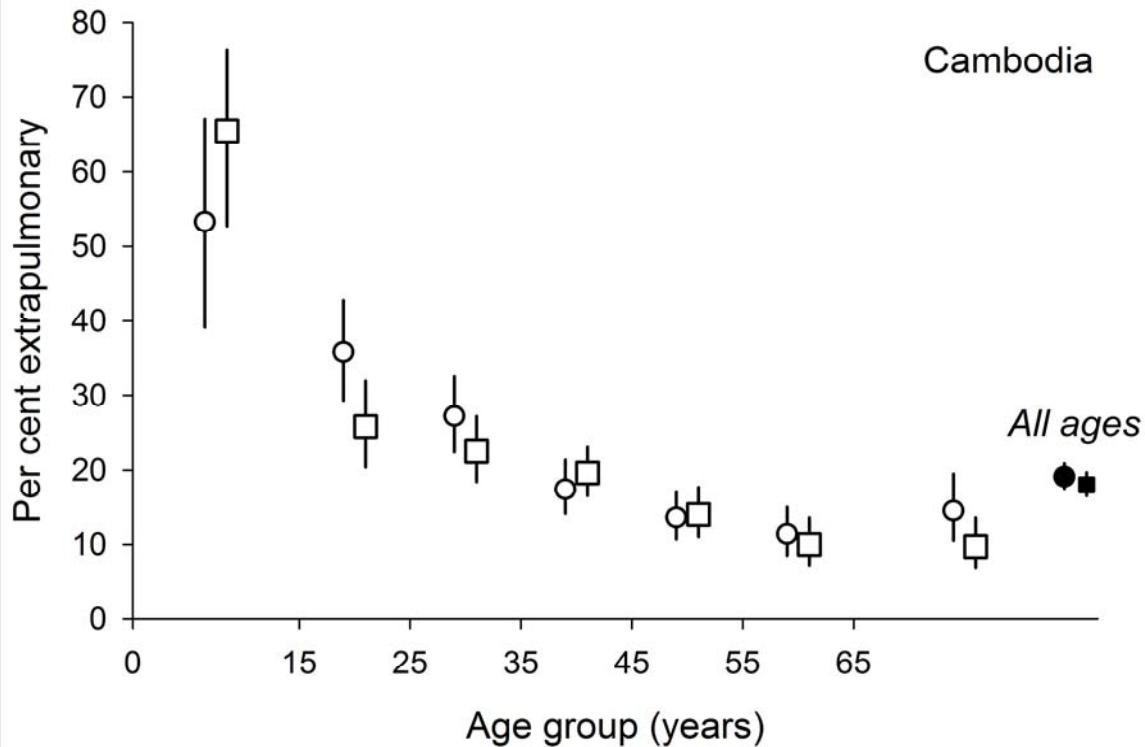

Supplement: MOESM3 [file 9488268]
